# Supplementary material for: 3D-printing Ag-line of front-electrodes with optimized size and interface to enhance performance of Si solar cells
Source: Royal Society of Chemistry journal article supplement (doi:10.1039/c6ra08985b), 2016-01-01
Supplement: c6ra08985b1.pdf [file c6ra08985b1.pdf]

## SUPPORTING INFORMATION

### **3D-printing Ag-line of front-electrodes with optimized size and interface to enhance performance of Si solar cells**

Yi Jiang,<sup>a</sup> Yibo Chen,<sup>a</sup> Mingjian Zhang,<sup>a</sup> Yang Qiu,<sup>a</sup> Yuan Lin<sup>\*a,b</sup> and Feng Pan<sup>\*a</sup>

School of Advanced Materials, Peking University, Peking University Shenzhen Graduate School, Shenzhen 518055, China. Tel: 86-755-26033200; E-mail: panfeng@pkusz.edu.cn, linyuan@iccas.ac.cn.

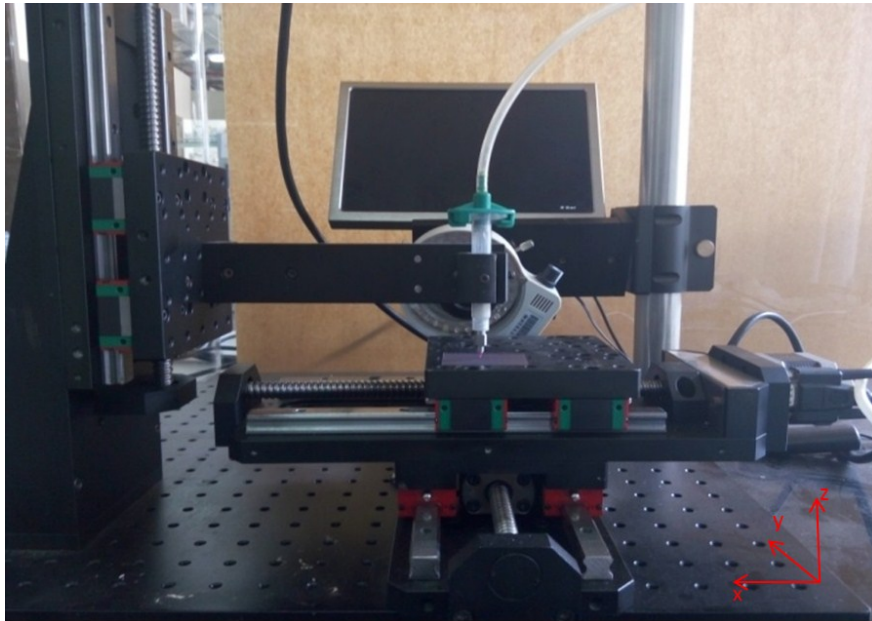

Figure S1 A brief overview of the self-designed 3D printing equipment.

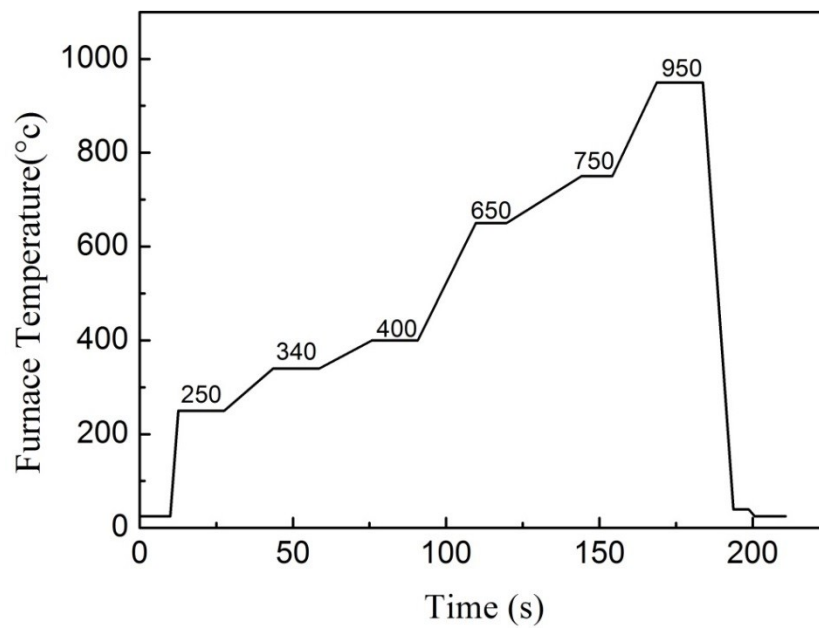

Figure S2 The temperature profile of co-sintered.

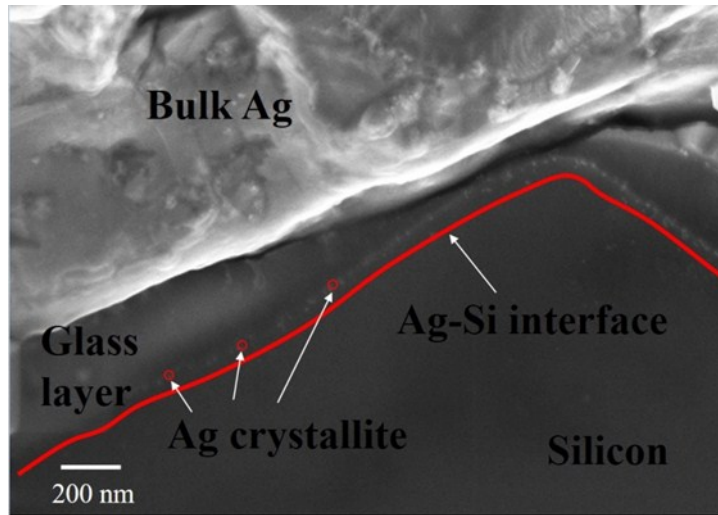

Figure S3 The SEM image of Ag/Si interface of Si solar cell with LWs (40  $\mu\text{m}$ ) and PCE (15.26%)
